# Supplementary material for: METTL protein family: focusing on the occurrence, progression and treatment of cancer
Source: Biomark Res. 2024 Sep 17;12:105. doi: 10.1186/s40364-024-00652-3 (PMC11409517; doi:10.1186/s40364-024-00652-3)
Supplement: Supplementary file 1 — Supplementary Material 1. [file 40364_2024_652_MOESM1_ESM.docx]

**Supplementary material 1:** The role of METTL protein family as a biomarker in cancer

| Member | Cancer type | METTL protein expression | Detection method | Reference |
| --- | --- | --- | --- | --- |
| METTL1 | Lung cancer | High expression | WB, IHC, TCGA analysis | 99 |
| Hepatocellular carcinoma | High expression | RNA‐seq, polyribosome‐associated mRNA‐qPCR, TCGA analysis, IHC, Northern blot, Western blot | 100-105 |
| Head and neck squamous cell carcinoma | High expression | TCGA analysis, Survival analysis, IHC, Northern blot, Western blot | 106 |
| Ameloblastoma | High expression | Survival analysis, IHC, Western blot, [Northern blot](https://www.sciencedirect.com/topics/neuroscience/northern-blot" \o "Learn more about Northern blot from ScienceDirect's AI-generated Topic Pages), Northwestern blot, qRT-PCR | 107 |
| Esophageal squamous cell carcinoma | High expression | IHC, WB | 108 |
| Glioma | High expression | Pan-cancer analysis, Correlation analysis, RT-PCR, IHC, RNA-seq, WB | 109 |
| METTL2A | Breast invasive carcinoma | High expression | Pan-Cancer Analysis, Analysis of Variance, CPTAC Database Mining, IHC, Univariate Analysis, Multivariate Analysis, Clinical Sample Analysis | 165, 166 |
| METTL3 | Esophageal squamous cell carcinoma | High expression | IHC, WB | 112-115 |
| Lung cancer | High expression | MeRIP-Seq, WB | 116-118 |
| Hepatocellular carcinoma | High expression | Pan-cancer analysis, Survival analysis | 119-123 |
| Intrahepatic cholangiocarcinoma | High expression | RT-PCR, IHC, WB | 124 |
| Colorectal cancer | High expression | Differential analysis, WB, IHC, Immunofluorescence | 125-128 |
| Bladder cancer | High expression | RT-qPCR, WB | 129 |
| Oral squamous cell carcinoma | High expression | Analysis of variance, Survival analysis, IHC | 90, 130 |
| Prostatic cancer | High expression | qRT-PCR, WB | 131, 132 |
| Cervical cancer | High expression | qRT-PCR, WB, IHC | 133, 134 |
| Gastric cancer | High expression | Analysis of variance, IHC, WB | 135 |
| Kidney renal clear cell carcinoma | High expression | Analysis of variance, IHC, WB | 141 |
| Renal cell carcinoma | Low expression | Analysis of variance | 142 |
| METTL5 | Hepatocellular carcinoma | High expression | Analysis of variance, Enrichment analysis, qRT-PCR, WB | 167 |
| METTL6 | Hepatocellular carcinoma | High expression | Analysis of variance, Enrichment analysis, WB | 168 |
| METTL7A | Lung adenocarcinoma | Low expression | Pan-cancer analysis, Survival analysis, IHC | 94 |
| Kidney renal clear cell carcinoma | Low expression | PPI network, GO enrichment analysis, Analysis of variance, Survival analysis | 84 |
| METTL7B | Lung adenocarcinoma | High expression | Analysis of variance, Survival analysis, IHC, WB | 95, 143 |
| Non-small cell lung cancers | High expression | Analysis of variance, Survival analysis, IHC, WB | 144, 145 |
| METTL11B | Colorectal cancer | High expression | TCGA database mining, Univariate analysis | 76 |
| METTL13 | Head and neck squamous cell carcinoma | High expression | Analysis of variance, Survival analysis, IHC, WB | 126 |
| Kidney renal clear cell carcinoma | Low expression | Analysis of variance, qRT-PCR, IHC, WB | 150 |
| METTL14 | Renal cell carcinoma | Low expression | Analysis of variance, Survival analysis, IHC, WB | 151 |
| Kidney renal clear cell carcinoma | Low expression | MRI | 94 |
| Acute myeloid leukemia | Low expression | Case-control study | 152 |
| Oral squamous cell carcinoma | Low expression | Analysis of variance, Survival analysis, IHC, WB, qRT-PCR | 153 |
| Colorectal cancer | Low expression | Analysis of variance, Survival analysis, IHC, WB, qRT-PCR | 154, 155 |
| Stomach adenocarcinoma | Low expression | Analysis of variance, Survival analysis, IHC, WB | 156 |
| Triple-negative breast cancer | Low expression | Analysis of variance, Survival analysis | 157 |
| Esophageal carcinoma | Low expression | Bioinformatics analysis | 158 |
| Osteosarcoma | Low expression | Analysis of variance, IHC | 16 |
| Hepatocellular carcinoma | Low expression | Pan-cancer analysis, Survival analysis | 121 |
| Nephroblastoma | Low expression | Case-control study | 159 |
| Pancreatic cancer | High expression | Analysis of variance, Survival analysis, IHC, WB | 161 |
| Breast Cancer | High expression | qRT-PCR | 162-164 |
| Head and neck squamous cell carcinoma | High expression | Analysis of variance, qRT-PCR | 95 |
| METTL16 | Hepatocellular carcinoma | High expression | Analysis of variance, Survival analysis, qRT-PCR | 169 |
| Bladder cancer | Low expression | Analysis of variance, Survival analysis, IHC, WB | 170 |
| METTL24 | Kidney renal clear cell carcinoma | Low expression | Analysis of variance, Survival analysis, IHC | 98 |
